# Clinically Translatable Cell Tracking and Quantification by MRI in Cartilage Repair Using Superparamagnetic Iron Oxides

Gerben M. van Buul<sup>1,2</sup>, Gyula Kotek<sup>1</sup>, Piotr A. Wielopolski<sup>1</sup>, Eric Farrell<sup>2,3</sup>, P. Koen Bos<sup>2</sup>, Harrie Weinans<sup>2,4</sup>, Anja U. Grohnert<sup>5</sup>, Holger Jahr<sup>2</sup>, Jan A. N. Verhaar<sup>2</sup>, Gabriel P. Krestin<sup>1</sup>, Gerjo J. V. M. van Osch<sup>2,3,9</sup>, Monique R. Bernsen<sup>1,\*</sup>

**1** Department of Radiology, Erasmus MC, Rotterdam, The Netherlands, **2** Department of Orthopaedics, Erasmus MC, Rotterdam, The Netherlands, **3** Department of Otorhinolaryngology, Erasmus MC, Rotterdam, The Netherlands, **4** Department of Biomechanical Engineering, Delft University of Technology, Delft, The Netherlands, **5** Department of Internal Medicine, Erasmus MC, Rotterdam, The Netherlands

## Abstract

**Background:** Articular cartilage has very limited intrinsic regenerative capacity, making cell-based therapy a tempting approach for cartilage repair. Cell tracking can be a major step towards unraveling and improving the repair process of these therapies. We studied superparamagnetic iron oxides (SPIO) for labeling human bone marrow-derived mesenchymal stem cells (hBMSCs) regarding effectivity, cell viability, long term metabolic cell activity, chondrogenic differentiation and hBMSC secretion profile. We additionally examined the capacity of synovial cells to endocytose SPIO from dead, labeled cells, together with the use of magnetic resonance imaging (MRI) for intra-articular visualization and quantification of SPIO labeled cells.

**Methodology/Principal Findings:** Efficacy and various safety aspects of SPIO cell labeling were determined using appropriate assays. Synovial SPIO re-uptake was investigated *in vitro* by co-labeling cells with SPIO and green fluorescent protein (GFP). MRI experiments were performed on a clinical 3.0T MRI scanner. Two cell-based cartilage repair techniques were mimicked for evaluating MRI traceability of labeled cells: intra-articular cell injection and cell implantation in cartilage defects. Cells were applied *ex vivo* or *in vitro* in an intra-articular environment and immediately scanned. SPIO labeling was effective and did not impair any of the studied safety aspects, including hBMSC secretion profile. SPIO from dead, labeled cells could be taken up by synovial cells. Both injected and implanted SPIO-labeled cells could accurately be visualized by MRI in a clinically relevant sized joint model using clinically applied cell doses. Finally, we quantified the amount of labeled cells seeded in cartilage defects using MR-based relaxometry.

**Conclusions:** SPIO labeling appears to be safe without influencing cell behavior. SPIO labeled cells can be visualized in an intra-articular environment and quantified when seeded in cartilage defects.

**Citation:** van Buul GM, Kotek G, Wielopolski PA, Farrell E, Bos PK, et al. (2011) Clinically Translatable Cell Tracking and Quantification by MRI in Cartilage Repair Using Superparamagnetic Iron Oxides. PLoS ONE 6(2): e17001. doi:10.1371/journal.pone.0017001

**Editor:** Marc Tjwa, University of Frankfurt - University Hospital Frankfurt, Germany

**Received:** October 12, 2010; **Accepted:** January 18, 2011; **Published:** February 23, 2011

**Copyright:** © 2011 van Buul et al. This is an open-access article distributed under the terms of the Creative Commons Attribution License, which permits unrestricted use, distribution, and reproduction in any medium, provided the original author and source are credited.

**Funding:** The authors gratefully acknowledge the support of the Smart Mix Program of the Netherlands Ministry of Economic Affairs and the Netherlands Ministry of Education, Culture and Science (grant # SSM06004); and the ENCITE consortium of the European Community under the 7th framework programme (grant # HEALTH-F5-2008-201842). The funders had no role in study design, data collection and analysis, decision to publish, or preparation of the manuscript.

**Competing Interests:** The authors have declared that no competing interests exist.

\* E-mail: m.bernsen@erasmusmc.nl

<sup>9</sup> These authors contributed equally to this work.

## Introduction

Articular cartilage provides low friction and allows for efficient load bearing and distribution in synovial joints. Cartilage is avascular, aneural and lacks lymphatic drainage. Consequently, natural repair mechanisms are underprovided, giving cartilage a very limited intrinsic regenerative capacity [1]. Current cell-based cartilage repair techniques aim at restoration of the functional properties of damaged cartilage. Human bone marrow-derived mesenchymal stem cells (hBMSCs) and chondrocytes are two cell-types currently used for these approaches [2,3,4,5]. hBMSCs can be either implanted in focal defects, or injected intra-articularly to

repair more generalized cartilage lesions like osteoarthritis [4,5]. Chondrocytes are mainly being used for implantation in focal cartilage defects, a procedure known as autologous chondrocyte implantation (ACI) [2,3]. Despite the improvements made in cell-based cartilage regeneration in the past decades, repaired cartilage does not entirely resemble native cartilage and can not guarantee a permanent solution at this moment [6].

To elucidate the relevant repair mechanisms and for optimization of cell-based therapies, it is necessary to determine the fate of implanted cells. Superparamagnetic iron oxides (SPIOs), such as ferumoxides, have already been used clinically for cell labeling and *in vivo* cell tracking in dermal oncology, neural regeneration and

pancreatic islet transplantation [7]. No negative effects of the labeling procedure have been reported in these initial clinical studies. Before implementing this approach to an orthopedic application, any possible negative influence of SPIO labeling on cell behavior must be ruled out. Besides repopulation of damaged tissue through proliferation and differentiation of hBMSCs, secretion of certain trophic factors by transplanted hBMSCs has more recently been suggested as a possible mechanism by which hBMSCs promote tissue regeneration [8]. These bioactive molecules could provide a regenerative microenvironment to initiate a self-regulated regenerative response. To our knowledge, the effects of SPIO labeling on factors secreted by hBMSCs have not been investigated before. Another point of interest is the feasibility of tracking SPIO-labeled cells within the joint in relation to other anatomical structures, using a clinical magnetic resonance imaging (MRI) protocol, in a model of clinically relevant size. For these purposes, it must be checked how long cells retain the SPIO label and it should be validated if generated MRI signals arise from originally labeled cells. Next to cell visualization, quantification of labeled cells implanted in cartilage defects by MRI could provide an exquisite opportunity to longitudinally map the role and contribution of implanted cells to cartilage repair. The aim of this study was to label hBMSCs using SPIOs and evaluate the effects of iron incorporation on cell viability, long term metabolic cell activity, differentiation and secretion profile. Furthermore we examined the SPIO retention of labeled cells and the capacity of synovial cells to endocytose SPIO from dead, labeled cells. Finally, we studied the use of MRI for accurate intra-articular visualization and quantification of SPIO labeled cells.

## Results

### Labeling effectivity and cell behavior

hBMSCs were efficiently labeled with ferumoxides-protamine sulfate complexes (Figure 1A). We observed a labeling efficiency

ranging from  $41.2 \pm 33.5\%$  at an SPIO dose of  $2.5 \mu\text{g}/\text{cm}^2$  to  $94.5 \pm 7.8\%$  at an SPIO dose of  $25 \mu\text{g}/\text{cm}^2$  (Figure 1B) with resulting average total iron loads (TILs) of cells ranging from  $4.0 \pm 2.9 \text{ pg}/\text{cell}$  to  $19.5 \pm 6.1 \text{ pg}/\text{cell}$  (Figure 1C). Both labeling efficiency and TIL increased in relation to SPIO labeling dose up to a dose of  $10 \mu\text{g}/\text{cm}^2$ . The higher SPIO dose of  $25 \mu\text{g}/\text{cm}^2$  did not significantly increase labeling efficiency ( $P = 0.42$ ) or average TIL ( $P = 0.50$ ). hBMSC viability was not influenced by SPIO labeling for dosages up to  $25 \mu\text{g}/\text{cm}^2$  (Figure 1D). Additionally, SPIO labeling did not inhibit cell metabolic activity compared to unlabeled controls for at least seven days (Figure 1E). Based on these results an SPIO dose of  $10 \mu\text{g}/\text{cm}^2$ , corresponding to a final labeling concentration of  $50 \mu\text{g}/\text{ml}$  SPIO, was considered optimal and used in all further experiments.

Chondrogenic differentiation was studied in cell pellets consisting of labeled and unlabeled cells at different ratios (0, 10, 50 and 100% of labeled cells). Differentiation was unaffected in all pellets containing labeled hBMSCs (10–100%) compared to control pellets consisting of unlabeled cells only. All pellets displayed a cartilaginous extracellular matrix rich in GAG and collagen type II (Figure 2A–H). Moreover, quantitative measurements revealed SPIO-labeled hBMSCs to produce comparable amounts of GAG (Figure 2I). In addition, gene expression of collagen type II was unaltered in SPIO-labeled hBMSCs after chondrogenic differentiation (Figure 2J).

To evaluate the influence of iron incorporation on cell secretions, we tested six cytokines containing anti- and pro-inflammatory cytokines as well as growth factors. No effect of SPIO-labeling on the secretion profiles was found (Table 1). SPIO-labeled hBMSCs produced comparable quantities of the anti- and pro-inflammatory cytokine IL-6 ( $P = 0.39$ ) and the growth factor VEGF ( $P = 0.31$ ) compared to unlabeled control cells. Furthermore, SPIO labeling did not induce the production of the pro-inflammatory cytokines  $\text{TNF}\alpha$  and  $\text{IFN}\gamma$ , the anti-inflammatory

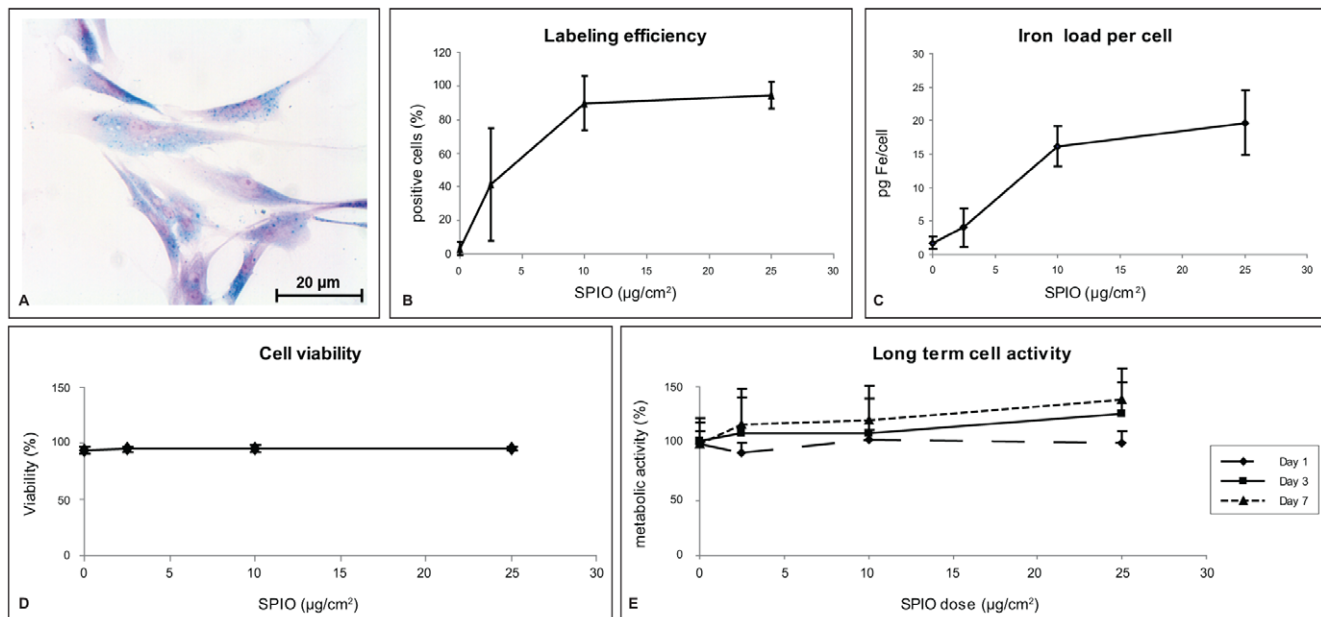

**Figure 1. Labeling human Bone Marrow stroma-derived mesenchymal Stem Cells (hBMSCs) using Superparamagnetic Iron Oxides (SPIO).** Perl's iron stain showing effective endocytosis of SPIO (A), leading to labeling efficiencies of approximately 95% (B) and a total iron load of approximately 20 pg/cell (C). SPIO labeling did not impair cell viability (D) or subsequent metabolic cell activity (E) at any dose used. Results shown for triplicate samples from three hBMSC donors.  
doi:10.1371/journal.pone.0017001.g001

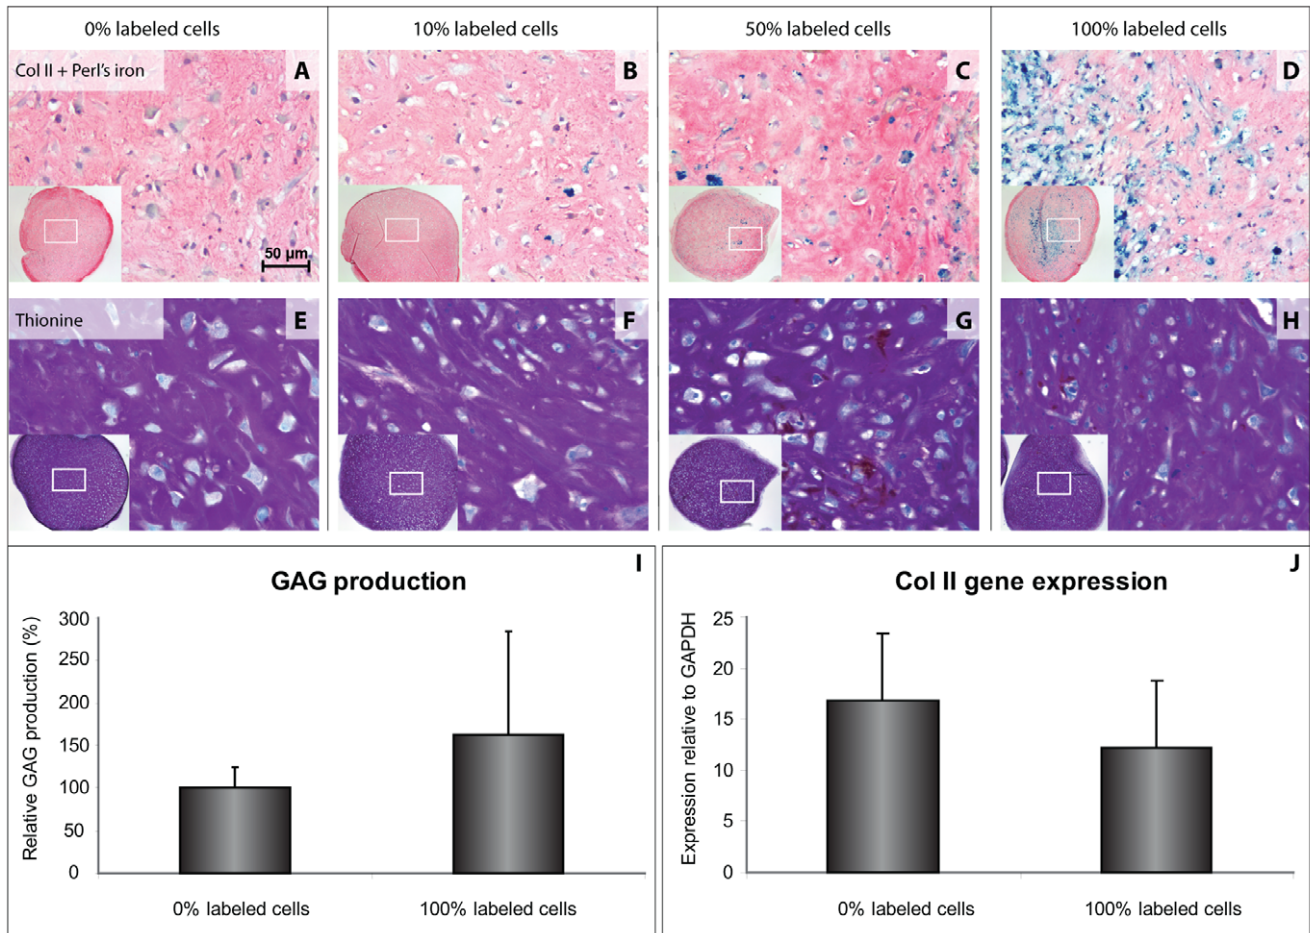

**Figure 2. Chondrogenic differentiation of hBMSCs is not affected by SPIO labeling.** Collagen II immunohistochemistry and Perl's iron stain demonstrated SPIO labeling to have no effect on pellet size or collagen II production, while iron remained present in differentiated pellets (A–D). Glycosaminoglycan deposition was also unaffected, as can be seen by thionin stain (E–H) and DMB assay (I). Gene expression of collagen II was unaltered by SPIO labeling (J). All analyses were performed after 35 days of differentiation. Insets display low magnification overviews of the entire pellets. Results shown for triplicate samples from two hBMSC donors. doi:10.1371/journal.pone.0017001.g002

**Table 1. Cytokine secretion of hBMSCs.**

| Cytokine (all values in pg/ml) | Control cells | SPIO-labeled cells |
|--------------------------------|---------------|--------------------|
| TNF $\alpha$                   | ≤d.l.         | ≤d.l.              |
| IFN $\gamma$                   | ≤d.l.         | ≤d.l.              |
| IL-6                           | 489±613       | 330±242            |
| IL-10                          | ≤d.l.         | ≤d.l.              |
| VEGF                           | 193±103       | 265±102            |
| FGF2                           | ≤d.l.         | ≤d.l.              |

hBMSC secretion profile of four cytokines and two growth factors was not influenced by SPIO labeling. Cytokines were measured in serum free 24 hour supernatant of labeled and unlabeled cells. SPIO did not induce the secretion of pro-inflammatory cytokines (TNF $\alpha$ , IFN $\gamma$ ), nor did it alter the secretion of the anti- and pro-inflammatory cytokine IL-6 or the growth factor VEGF. The anti-inflammatory factor IL-10 and growth factor FGF2 were not secreted at a detectable level by control or SPIO-labeled cells. TNF- $\alpha$ : tumor necrosis factor-alpha, IFN- $\gamma$ : interferon-gamma, IL: interleukin, VEGF: vascular endothelial growth factor, FGF: fibroblast growth factor, ≤d.l.: below detection level (10 pg/ml). Results shown for duplicate samples from five hBMSC donors. doi:10.1371/journal.pone.0017001.t001

cytokine IL-10 or the growth factor FGF2. These four factors were not detectably secreted by control or SPIO-labeled hBMSCs.

**Cell visualization by MRI**

All cell doses injected intra-articularly could be visualized by MRI. The number of injected cells was related to the number and extent of areas with signal loss detected by MRI (Figure 3A–D, arrows). Injected hBMSCs were found scattered throughout the joint, clearly distinguishable from anatomical structures in all conditions. In addition, presence of labeled cells did not interfere with regular evaluation of knee anatomy.

For cell implantation experiments we created cartilage defects of 75  $\mu$ l in porcine osteochondral plugs *in vitro* (Fig. S1A). Labeled hBMSCs implanted in cartilage defects were homogeneously distributed and could be clearly distinguished from surrounding bone and cartilage by MRI. The extent of signal loss in the seeded plugs was dependent on the labeled cell dose used (Figure 3E–I). The minimal labeled cell concentration we could visualize was  $0.4 \times 10^6$ /ml. To show the potential applicability of this technique in a clinical ACI-like procedure, we subsequently implanted labeled hBMSCs in a cartilage defect in an intact porcine knee. In this setting the SPIO-labeled cells were also clearly distinguishable from the surrounding tissues (Figure 3J). Post MRI, Perl's iron



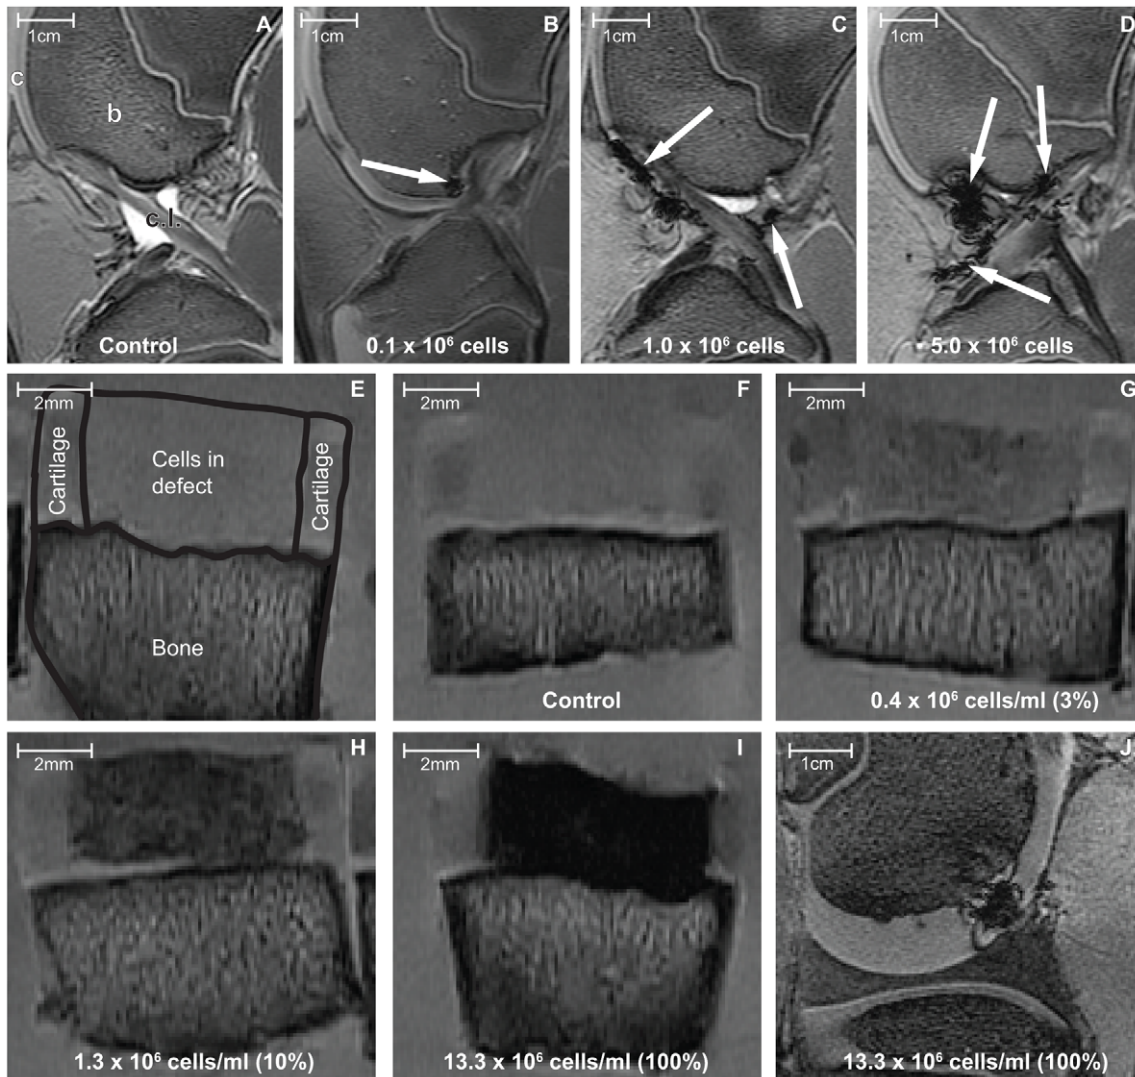

**Figure 3. MRI visualization of SPIO-labeled hBMSCs in an intra-articular environment.** Injected cells were visualized in a dose dependent manner (A–D, in-plane resolution  $273 \times 273 \mu\text{m}$ ; slice thickness  $600 \mu\text{m}$ ). Cells were found scattered throughout the joint (arrows) and could be discerned from intra-articular structures. Labeled cells implanted in cartilage defects *in vitro* were homogeneously distributed and imaged in a comparable way; dose dependent and clearly distinguishable from structures like cartilage and bone (E–I; in-plane resolution  $78 \times 78 \mu\text{m}$ ; slice thickness  $1500 \mu\text{m}$ ). After implanting cells in a cartilage defect in an intact porcine knee, MRI showed the cells inside the defect (J; in-plane resolution  $273 \times 273 \mu\text{m}$ ; slice thickness  $400 \mu\text{m}$ ). In (A); b: bone; c: cartilage; c.l.: cruciate ligament. Intra-articular cells in porcine knees were imaged as a single sample for one donor. hBMSCs implanted in cartilage defects *in vitro* were imaged in duplicate samples from two hBMSC donors.  
doi:10.1371/journal.pone.0017001.g003

stain confirmed SPIO positive cells to be present inside the defect (Fig. S1B).

A point of interest is whether observed areas with signal loss are generated by originally labeled cells, since SPIO remains in the joint after labeled cells die. The joint cavity is lined by an inner layer of synovial tissue that contains macrophages. We investigated the capacity of synovial cells to endocytose SPIO from labeled cells, by seeding dead or living GFP-SPIO co-labeled chondrocytes on synovial tissue explants. In the synovium samples seeded with living GFP-SPIO co-labeled cells, GFP<sup>+</sup> cells were observed immediately after seeding (Fig. S2A). Moreover, GFP<sup>+</sup>-SPIO<sup>+</sup> cells were found after the co-culture period of five days, suggesting these cells to be originally labeled chondrocytes (Figure 4A and 4B). When seeded with dead GFP-SPIO co-labeled cells, fluorescence microscopy confirmed the vast majority of cells to have died directly following the freeze-thaw procedure (Fig. S2B).

After five days of co-culture,  $88.4 \pm 11.4\%$  of the SPIO<sup>+</sup> cells were GFP in these samples, indicative of iron re-uptake by synovial cells (Figure 4C–E). Next to this, extracellular SPIO aggregates were found attaching to the synovial membrane (Figure 4D inset). In samples seeded with living chondrocytes,  $25.5 \pm 10.5\%$  of SPIO positive cells showed no GFP signal either. Whether this was due to extinguishing GFP signal from originally labeled chondrocytes, synovial re-uptake of SPIO from living cells, or caused by iron re-uptake from seeded cells that died during the co-culture period, could not be determined.

#### Cell quantification by MR-based relaxometry

In addition to visualization of seeded cells by MRI, we were able to quantify the concentration of hBMSCs seeded in defects *in vitro* by applying a  $R2^*$  mapping technique, in which  $R2^* = 1/T2^*$  (Figure 5A–E). A linear relationship between  $R2^*$  values and

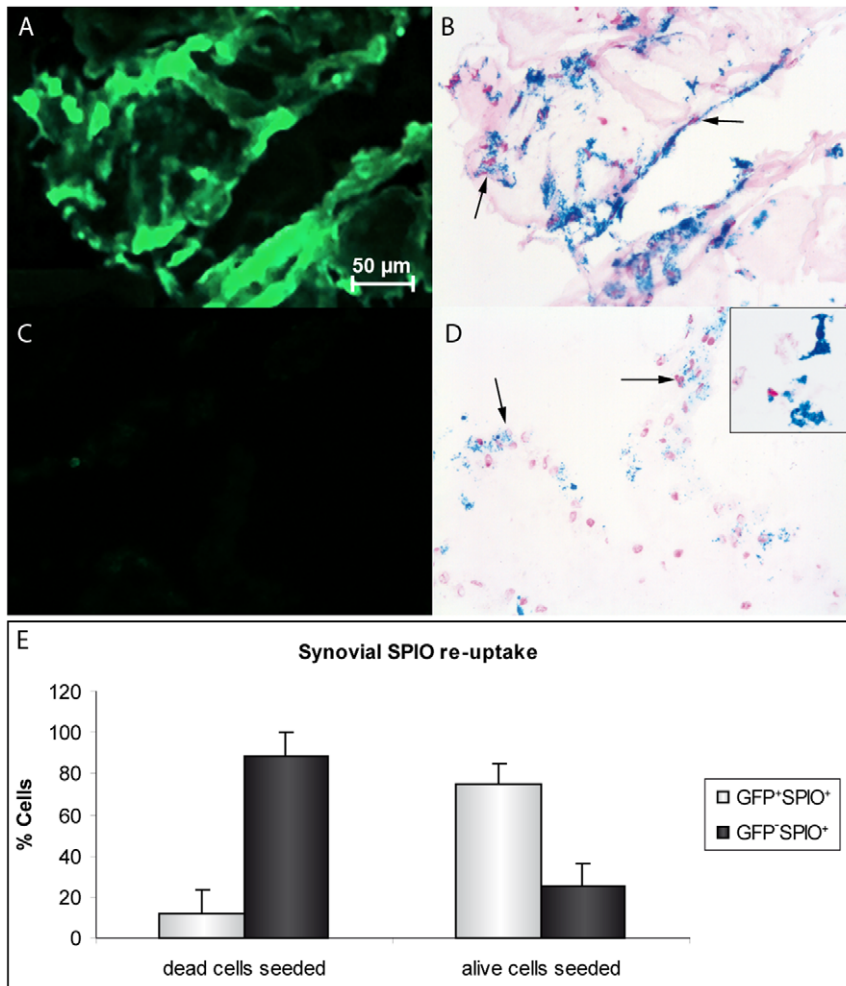

**Figure 4. SPIO re-uptake by human synovial explants.** Fluorescent images and Perl's iron stain of GFP-SPIO co-labeled chondrocytes seeded on synovial explants. GFP<sup>+</sup>-SPIO<sup>+</sup> cells, indicating originally seeded chondrocytes, were seen in samples seeded with living cells (A,B). In samples seeded with dead cells, GFP<sup>-</sup>-SPIO<sup>+</sup> cells were found, indicating SPIO re-uptake by synovial cells (C,D). Furthermore, extracellular SPIO aggregates were observed attached to the synovial explants (D, inset). Approximately 90% of SPIO<sup>+</sup> cells in samples seeded with dead chondrocytes were not originally labeled cells, compared with 25% of SPIO<sup>+</sup> cells in samples seeded with living cells (E). Arrows indicate SPIO containing cells. Results shown for triplicate samples from two synovium donors. doi:10.1371/journal.pone.0017001.g004

labeled cell concentrations of  $0.4 \times 10^6$ – $2.6 \times 10^6$  cells/ml was found (Figure 5F).  $R2^*$  values ranged from  $45 \pm 22$ – $460 \pm 120$  ms<sup>-1</sup> for these labeled cell concentrations. Below  $0.4 \times 10^6$  cells/ml, SPIO-generated  $R2^*$  signal was insufficient for reliable differentiation from defects seeded with unlabeled hBMSCs. At the very high labeled cell concentration of  $13 \times 10^6$  labeled cells/ml  $R2^*$  values could no longer be determined, since the values exceeded those measurable with our clinical acquisition parameter range. At this high SPIO concentration a signal-to-noise ratio of approximately 1.6 was obtained, which signifies that the signal loss was not reliably discernable from background noise.

## Discussion

Cell-based cartilage repair techniques are developing rapidly, and the use of hBMSCs as a treatment for focal cartilage defects and osteoarthritis shows promising results [5,9]. Clinically translatable cell tracking represents a vital tool to aid in the elucidation of the repair mechanisms of these therapies, and in further improving them. In this study we have shown that SPIO

labeling of hBMSCs is effective and does not impair cell viability, long term metabolic cell activity, chondrogenic differentiation, or the secretion of a panel of six cytokines involved in inflammation and tissue regeneration. We were able to accurately visualize intra-articular SPIO-labeled hBMSCs and quantify cells seeded in localized cartilage defects by means of an  $R2^*$  mapping MRI technique.

Regarding the influence of SPIO labeling on chondrogenic capacity of BMSCs, some discrepancies can be found in recent reports. Some groups mention no influence of SPIO labeling on chondrogenic differentiation of BMSCs [10,11], whereas others do report a negative effect [12,13]. These conflicting data could be due to the wide variety in protocols for SPIO labeling and chondrogenic differentiation used. Furthermore, the influence of cellular iron load on chondrogenic differentiation has been described [13,14]. As reported in this paper we found no SPIO-related negative effects in our chondrogenic assays with freshly isolated cells. However, we have observed inhibitory effects if we used cryopreserved cells in pellets containing  $\geq 50\%$  labeled cells, although pellets with 10% labeled cells appeared unaltered (Fig.

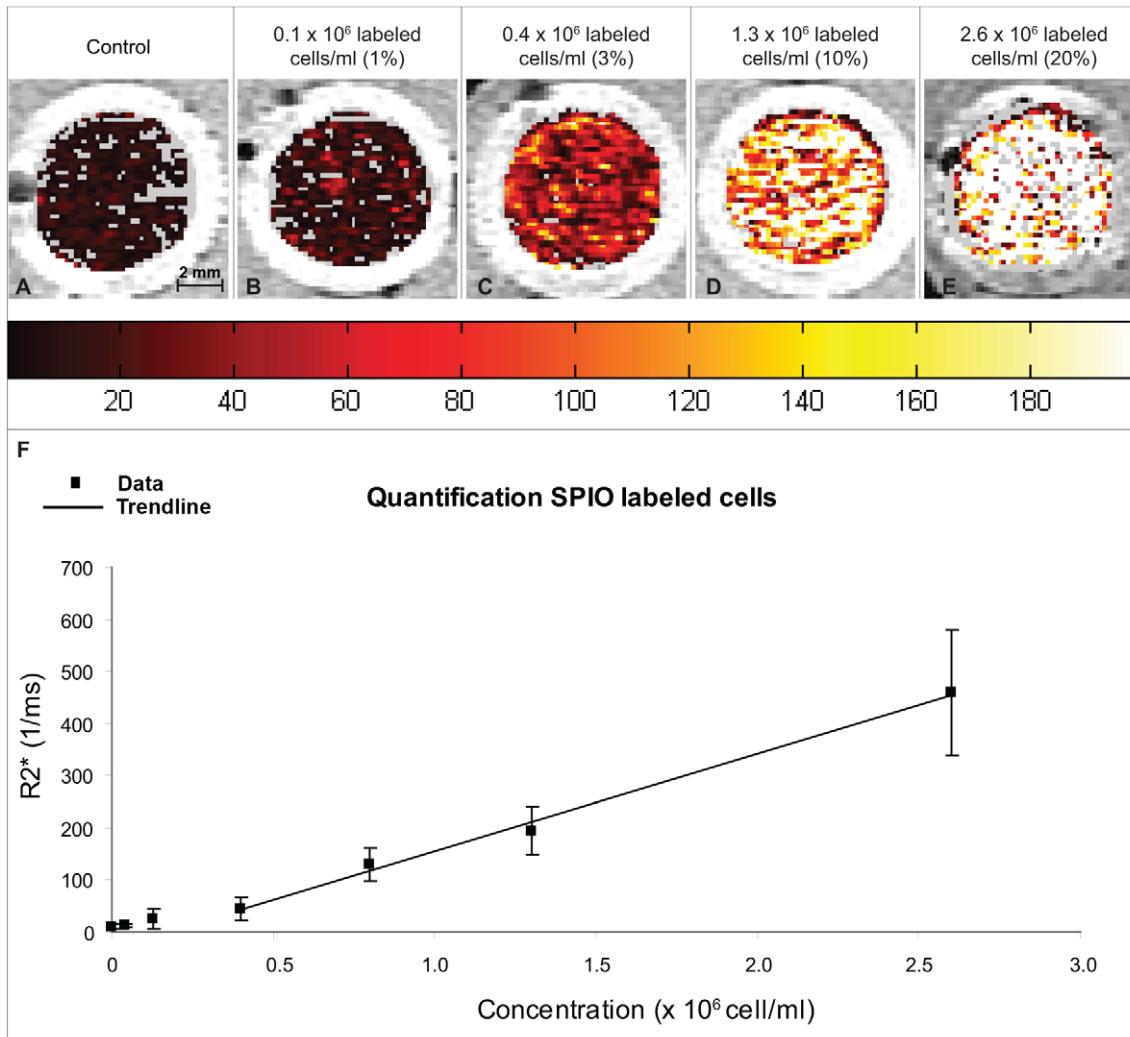

**Figure 5. Quantification of SPIO-labeled cells implanted in cartilage defects *in vitro*.** Transverse  $R2^*$  maps from identical osteochondral plugs as shown in figure 3, visualize the differences in labeled cell concentrations (A–E; in-plane resolution  $156 \times 156 \mu\text{m}$ , slice thickness  $700 \mu\text{m}$ ). A linear relationship between labeled cell concentration and  $R2^*$  value was found in a range of  $0.4 \times 10^6$ – $2.6 \times 10^6$  cells/ml (F). Grey voxels inside the defects represent positions where  $R2^*$  values could not be obtained due to a too low (mainly in A,B) or too high (mainly in E) local concentration of SPIO. Results shown for duplicate samples from two hBMSC donor for samples containing 0;  $1.3 \times 10^5$ ;  $4.0 \times 10^5$  and  $1.3 \times 10^6$  cells/ml. Samples containing  $4.0 \times 10^4$ ;  $8.0 \times 10^5$  and  $2.6 \times 10^6$  cells per ml were scanned in duplicates for one hBMSC donor. doi:10.1371/journal.pone.0017001.g005

S3A–D). Therefore we recommend further investigation regarding this subject when using cryopreserved hBMSCs.

Besides cell proliferation and differentiation, other hBMSC capacities are relevant in regenerative medicine as well. Recently, secretion of trophic factors was postulated as a possible role for hBMSCs in cartilage regeneration [8]. We demonstrated that the hBMSC secretion profile of six important factors involved in inflammation and cell growth was not affected by SPIO. Previous research has shown that SPIO labeling does not impair hBMSC immunomodulatory capacities in a mixed lymphocyte reaction [15]. Furthermore, it has been described that gene expression of neural stem cells, with the exception of iron homeostasis related genes, remains largely unaltered after SPIO labeling [16]. We report, to our knowledge, for the first time the influence of SPIO labeling on cell secretions at a protein level. These findings could be relevant for other regenerative medicine fields using hBMSCs, like cardiology, neurology and organ transplantation [17]. In summary we found no deleterious effects of our labeling procedure

on cell functionality. When labeling only part of the applied cells, which in our experiments sufficed for accurate intra-articular MRI traceability, the risk of possible negative effects will even be further diminished.

In order to translate our labeling method to a cell tracking approach in an intra-articular environment, we investigated the MRI traceability of clinically used amounts of SPIO-labeled cells in a joint model of a clinically relevant size. Jing et al. previously visualized cells labeled with SPIO in rabbit knee joints by MRI [18]. Through the use of a clinical phased-array head coil and specific MRI parameters we were able to increase MRI resolution (in plane resolution  $273 \times 273 \mu\text{m}$ ), which is higher than in other studies performing intra-articular cell tracking or general clinical anatomical intra-articular imaging by MRI [19,20]. This enabled dose-dependent visualization of labeled cells and discrimination from intra-articular structures like cruciate ligaments, cartilage and subchondral bone. Following our *in vitro* cell implantation experiments, we visualized SPIO-labeled cells implanted in an

ACI-like procedure in an intact porcine knee. Air artifacts show up as hypointensities on MRI, which interferes with the signal loss generated by labeled cells. To avoid these artifacts, we were obliged to perform this operation under water. This is impracticable in a clinical setting indicating that immediately post-operative this technique can be used to visualize cells that remained in the defect, but that the technique is unsuitable to discern labeled cells that might have leaked in the intra-articular space. These leaked-out cells could be identified after intra-articular air has resolved, which in our personal clinical experience occurs within a day.

SPIO for cell-labeling has great clinical potential, but unfortunately the label will dilute upon cell division. This could limit the duration that cells can be accurately detected by MRI. Previous results from our group and others show an approximate 75% decrease in SPIO positive cells after 7 days of expansion in culture [21] and a total loss of iron after 5–8 cell divisions in rapidly dividing HeLa cells [22]. On the other hand, duration of traceability increases with slower proliferating cells, and SPIO could be detected after 44 days in non-dividing human MSCs [22]. Accordingly, our group previously reported traceability *in vivo* of SPIO labeled human MSCs in a subcutaneous mouse model for at least seven weeks post labeling [10]. In additional experiments we found a marked decrease in SPIO-generated signal voids from proliferating labeled hBMSCs over a period of 14 days *in vitro*, representing 5–6 cell divisions (data not shown). How long SPIO labeled cells can be detected in an intra-articular environment remains to be studied in an *in vivo* model.

Another point regarding accurate detection of labeled cells is the fact that cell death will not result in the disappearance of the label. SPIOs released from these cells could lead to misinterpretation of MR images. Pawelczyk et al. have previously shown approximately 10–20% of local macrophages to become SPIO positive after injection of SPIO-labeled BMSCs in a subcutaneous inflammation mouse model [15]. Synovium contains the majority of macrophages present in synovial joints. We observed the vast majority of SPIO<sup>+</sup> cells to be non-originally labeled after applying dead, labeled cells on synovial explants. In the case of cell implantation in a cartilage defect, SPIO re-uptake by host cells might be of less consequence because there is no direct contact between the cells seeded in the defect and the synovial membrane. Nonetheless, before clinical application we recommend *in vivo* animal studies using intra-articular cell tracking by MRI in combination with histological confirmation of the localization of originally labeled cells. This would enable the correct interpretation of obtained MR images.

Besides visualizing cells, we were able to quantify beforehand known cell concentrations implanted in cartilage defects in a clinically relevant cell-concentration range. To our knowledge, this has not been reported before in a model comprising biological tissue. Rad et al. were unsuccessful in translating their SPIO-labeled cell quantification experiments to an *ex vivo* setting [23], and Politi et al. did not validate their *ex vivo* quantification results afterwards [24]. Since the original concentration of applied cells is known in an ACI procedure, and seeded in a confined volume, it is possible to quantify the total amount of labeled cells and follow them in the same patient in subsequent MRI sessions. Since both hBMSCs and chondrocytes can be labeled using SPIO [25,26], these findings indicate the potential of SPIO labeling for tracking cells in numerous orthopedic treatments and many other regenerative medicine fields [27]. Cell visualization and especially quantification using MRI can be a major step towards improvement in all these applications.

In summary, we consider SPIO labeling to hold great potential for clinically translatable cell tracking using MRI in cell-based cartilage repair. In an experimental setting this would show the distribution and diffusion of the applied cells, thereby elucidating the regenerative mechanisms and providing opportunities to improve current repair strategies. The use of MRI has the advantage of simultaneous cell tracking and evaluation of cartilage regeneration in one MRI session.

## Materials and Methods

### Ethics Statement

All human samples were obtained after approval by the Erasmus MC medical ethical committee. hBMSCs were isolated from heparinized femoral-shaft marrow aspirate of patients undergoing total hip arthroplasty (after written informed consent; protocol # MEC-2004-142). Articular cartilage and synovial explants were obtained as redundant material from patients undergoing total knee replacement surgery. All patients implicitly consented to the use of these tissues for scientific research (protocol # MEC-2004-322).

### Cell isolations and cultures

hBMSCs and human chondrocytes were isolated and cultured using previously described procedures [28,29]. All isolated cells or explants were cultured in DMEM containing 10% FCS, 50 µg/ml gentamicin and 1.5 µg/ml fungizone (defined as standard medium) unless stated otherwise. hBMSCs were cultured using additional 1 ng/ml FGF2 and  $1 \times 10^{-4}$  M vitamin C. All hBMSCs and chondrocytes were used at passage 2–5 in labeling experiments.

### SPIO labeling

SPIO labeling was performed using ferumoxides (Endorem®, Guerbet S.A., Paris, France) complexed to protamine sulfate (LEO Pharma N.V., Wilrijk, Belgium) as described earlier [25]. For removal of extracellular iron, cells were washed with PBS containing heparin 10 U/ml (LEO Pharma B.V., Breda, the Netherlands). SPIO labeling mix was made at a constant concentration of 100 µg/ml ferumoxides with 5 µg/ml protamine to ensure identical particle formation [30]. Cells were labeled with doses ranging from 2.5–25 µg/cm<sup>2</sup> of ferumoxides.

### Labeling efficiency, chondrogenic differentiation and functional assays

Histological iron detection was performed using a Perl's iron stain (Klinipath BVBA, Duiven, the Netherlands) according to the manufacturer's protocol. Labeling efficiency was determined in triplicate samples for three donors by manually counting labeled cells stained with Perl's iron [25]. Total iron load was measured in triplicate samples from three donors by inductively coupled plasma - optical emission spectroscopy [25]. Cell viability was evaluated by trypan blue exclusion. After labeling, cells were seeded in 96-well plates at a density of 10,000 cells per well. AlamarBlue® (Invitrogen, Breda, the Netherlands) was used according to manufacturer's protocol for longitudinal measurement of metabolic cell activity at day 0, 3 and 7.

Chondrogenic differentiation was performed in triplicate samples on hBMSCs pellets from two donors according to previously reported protocols [31]. Chondrogenically differentiated hBMSCs were stained using a collagen II monoclonal antibody (II-II6B3; Developmental Studies Hybridoma Bank, Iowa City, IA) and thionine stain [31,32]. hBMSCs used for gene expression analysis and glycosaminoglycan (GAG) measurements were chondrogeni-



cally differentiated in alginate beads [33] using an otherwise identical differentiation protocol. RNA extraction, cDNA synthesis, real-time RT-PCR and collagen II primers for gene expression analysis were described earlier [34]. GAG measurements were performed using a dimethylmethylene blue (DMB) assay [35].

To investigate the influence of SPIO labeling on cytokines secreted by hBMSCs, labeled and unlabeled cells from five donors were cultured for 24 hours in serumfree standard medium supplemented with ITS+1 (serum replacement; BD Bioscience, Bedford, MA) in a 1:100 v/v ratio. Secretion of tumor necrosis factor- $\alpha$  (TNF- $\alpha$ ), interferon-gamma (IFN- $\gamma$ ), interleukin (IL)-6, IL-10, vascular endothelial growth factor (VEGF) and fibroblast growth factor 2 (FGF2) were analyzed in duplicate samples using a human Cytokine Bead Array flexsets (BD Bioscience, Breda, the Netherlands) according to the manufacturer's protocol. Flow cytometric measurements were performed on a FACSCanto II (BD, San Jose, CA, USA) and analyzed using FACSDiva software version 6.1.2 (BD Biosciences).

### Intra-articular cell injections and cell implantations

Due to the *ex vivo* nature of our MRI experiments, all cells were fixed in 4% formalin prior to injection or implantation. SPIO-labeled hBMSCs were injected *ex vivo* into porcine knees (Yorkshire  $\times$  Landrace, 35 kilograms, age 4–5 months) in a dose range of  $0.1 \times 10^6$  to  $5 \times 10^6$  labeled cells (injected in 100  $\mu$ l physiological saline). For cell implantation, osteochondral plugs with a diameter of 8 mm were harvested from porcine femoral condyles *ex vivo*. Circular full-cartilage defects of 6 mm diameter (approximate volume of 75  $\mu$ l) were created in those plugs. Cells from two donors were suspended in 1% Agar (Fluka BioChemika, Sigma-Aldrich, Buchs, Switzerland) in saline before implantation. A total of  $1 \times 10^6$  cells were seeded per defect *in vitro* (cell concentration of  $13 \times 10^6$  cells/ml), containing 0.3 – 100% labelled cells (i.e.  $0.04 \times 10^6$ – $13 \times 10^6$  labeled cells/ml). Cell implantation was also performed *ex vivo* in an intact porcine knee according to previously described autologous chondrocyte implantation (ACI) procedures [2]. The knee joint was opened and a circular cartilage defect was created (diameter 6 mm; volume 75  $\mu$ l). A periosteal flap was sutured on top of the defect using PDS 6-0 sutures (Johnson & Johnson, New Brunswick, New Jersey) and fibrin glue (Tissucol<sup>®</sup> Duo 500, Baxter, Uden, the Netherlands) was applied at 90% of the edges of the flap as a sealant.  $1 \times 10^6$  SPIO-labeled cells suspended in 1% Agar, were seeded into the defect and fibrin glue was used to seal the final 10% of the periosteal flap margin. The joint was closed in layers afterwards. All surgical procedures - except the cell seeding and fibrin glue application - were performed under water in order to prevent air artifacts on MRI.

### Validation SPIO-generated signal

To validate if SPIO-generated signal was related to originally labeled cells, or that SPIO particles were taken up by host cells, human green fluorescent protein (GFP) transfected chondrocytes were co-labeled with SPIO. Cells were lentivirally transduced and constitutively expressed GFP under the control of a CMV promoter (SHC003 vector, Sigma-Aldrich Mission<sup>®</sup>, shRNA library). To investigate the fate of SPIO after cell death, we considered the cell type used for labeling less relevant and chose chondrocytes over hBMSCs due to their substantially higher transduction efficiency.  $25 \times 10^4$  GFP<sup>+</sup>-SPIO<sup>+</sup> cells were seeded in duplicates on synovial explants from two human donors. Cells were alive or killed (by repeated free-thaw cycles) before seeding. Cells and synovial explants were co-cultured for five days. Fluorescent images were made from frozen sections using an Axiovert s100 microscope (Carl Zeiss B.V., Sliedrecht, the

Netherlands). Subsequently, samples were stained using Perl's iron stain and corresponding fields of view were evaluated by light microscopy. GFP and SPIO containing cells were determined by manually counting a minimum of 100 cells per sample.

### Magnetic Resonance Imaging

Scanning was performed on a clinical 3.0T MRI scanner (General Electric Healthcare, Milwaukee, Wisconsin). A 3D SPGR sequence was used to scan labeled hBMSCs *in vitro* (TR 87.7 ms, TE 15.1 ms, FOV 17 mm, matrix  $512 \times 512$ , scanning time 11 min. 35 sec.) in combination with a custom made receive-only surface coil with a diameter of 1 cm. Scanning of injected or implanted hBMSCs in intact porcine knees was performed using a FIESTA-3D sequence (TR 7.9 ms, TE 2.2 ms, FOV 140 mm, matrix  $512 \times 256$ , scanning time 28 min. 46 sec.) and a clinical phased-array head coil. Images of hBMSCs implanted in defects *in vitro* were obtained by a Spin Echo sequence (TR 1500 ms, TE 40 ms, FOV 40 mm, matrix  $512 \times 512$ , scanning time 14 min. 42 sec.) and a custom made receive-only surface coil with a diameter of 3 cm. R2\*-mapping was performed in duplicate samples for two hBMSC donors by a SPGR sequence (TR 45 ms, TE 4–120 ms, FOV 40 mm, matrix  $256 \times 256$ , scanning time 21 min. 21 sec.). R2\* values were calculated and validated by mono-exponential curve fitting (MATLAB 7.0.1, MathWorks, MA). Voxels with an  $r^2 < 0.95$  were excluded from the measurements.

### Statistical analysis

Statistical differences between different treatment groups were analysed by the paired Student t-test (normality test  $p > 0.05$ ). P-values of  $\leq 0.05$  were considered statistically significant. All numerical data are presented as mean  $\pm$  standard deviation.

### Supporting Information

**Figure S1 *In vitro* and *ex vivo* cell implantation procedures.** Osteochondral plugs with a diameter of 8 mm were created from the femoral part of porcine knees (A). *Ex vivo*, post-MRI Perl's iron stain shows macroscopically the presence of blue, iron containing cells in the defect (B). Dotted line in (A) represents created defect. Intra-articular cell implantation in a porcine knee was performed for one donor. (TIF)

**Figure S2 Cell seeding on synovial explants.** Fluorescent images directly after seeding GFP<sup>+</sup>-SPIO<sup>+</sup> cells on synovial explants showing abundant GFP signal in samples seeded with living cells (A), while GFP signal is absent in samples seeded with dead cells (B). This confirmed that the vast majority of killed cells had not survived the multiple freeze-thaw procedures. Representative images are shown for triplicate samples from two synovium donors. (TIF)

**Figure S3 Chondrogenic differentiation of cryopreserved SPIO-labeled hBMSCs.** Perl's iron stain (A–D) and collagen II immunohistochemistry (A–C) of chondrogenically differentiated cryopreserved hBMSCs. SPIO labeling of 10% of the cells did not influence pellet size or collagen II deposition compared to control cells (A and B). Using 50% of SPIO-labeled cells did negatively influence these outcome measures (C). Pellets consisting of 100% of labeled cells disintegrated within 7 days, showing viable and iron containing cells on a cytospin (D). Results shown for triplicate samples from two hBMSC donors. (TIF)



## Acknowledgments

The authors are grateful to N. Kops, J.L.M. Koevoet, S.T. van Tiel and J. van der Slegt for their technical assistance; to M. Hoogduijn for his assistance in obtaining and analyzing the CBA data; to A. Uijterdijk for kindly providing porcine materials; to J.H. Waarsing for his support with statistical analyses; and to U. Woronicka and B. Wolterbeek for their assistance with the ICP-OES measurements. The monoclonal antibody developed by T. Linsenmayer was obtained from the Developmental Studies Hybridoma Bank developed under the auspices of the NICHD and

maintained by The University of Iowa, Department of Biology, Iowa City, IA.

## Author Contributions

Conceived and designed the experiments: GMvB GK PAW EF PKB HW JANV GPK GJVMvO MRB. Performed the experiments: GMvB GK PAW PKB AUG HJ. Analyzed the data: GMvB GK PAW GJVMvO MRB. Contributed reagents/materials/analysis tools: GMvB GK PAW PKB HW GJVMvO MRB AUG HJ. Wrote the paper: GMvB GK PAW EF PKB HW JANV GPK GJVMvO MRB.

## References

- Steinert AF, Ghivizzani SC, Rethwilm A, Tuan RS, Evans CH, et al. (2007) Major biological obstacles for persistent cell-based regeneration of articular cartilage. *Arthritis Res Ther* 9: 213.
- Brittberg M, Lindahl A, Nilsson A, Ohlsson C, Isaksson O, et al. (1994) Treatment of deep cartilage defects in the knee with autologous chondrocyte transplantation. *N Engl J Med* 331: 889–895.
- van Osch GJ, Brittberg M, Dennis JE, Bastiaansen-Jenniskens YM, Erben RG, et al. (2009) Cartilage repair: past and future—lessons for regenerative medicine. *J Cell Mol Med* 13: 792–810.
- Centeno CJ, Schultz JR, Cheever M, Robinson B, Freeman M, et al. (2010) Safety and complications reporting on the re-implantation of culture-expanded mesenchymal stem cells using autologous platelet lysate technique. *Curr Stem Cell Res Ther* 5: 81–93.
- Wakitani S, Nawata M, Tensho K, Okabe T, Machida H, et al. (2007) Repair of articular cartilage defects in the patello-femoral joint with autologous bone marrow mesenchymal cell transplantation: three case reports involving nine defects in five knees. *J Tissue Eng Regen Med* 1: 74–79.
- Saris DB, Vanlauwe J, Victor J, Haspl M, Bohnsack M, et al. (2008) Characterized chondrocyte implantation results in better structural repair when treating symptomatic cartilage defects of the knee in a randomized controlled trial versus microfracture. *Am J Sports Med* 36: 235–246.
- Bulte JW (2009) In vivo MRI cell tracking: clinical studies. *AJR Am J Roentgenol* 193: 314–325.
- Caplan AI (2007) Adult mesenchymal stem cells for tissue engineering versus regenerative medicine. *J Cell Physiol* 213: 341–347.
- Centeno CJ, Busse D, Kisiday J, Keohan C, Freeman M, et al. (2008) Increased knee cartilage volume in degenerative joint disease using percutaneously implanted, autologous mesenchymal stem cells. *Pain Physician* 11: 343–353.
- Farrell E, Wielopolski P, Pavljasevic P, van Tiel S, Jahr H, et al. (2008) Effects of iron oxide incorporation for long term cell tracking on MSC differentiation in vitro and in vivo. *Biochem Biophys Res Commun* 369: 1076–1081.
- Pawelczyk E, Arbab AS, Pandit S, Hu E, Frank JA (2006) Expression of transferrin receptor and ferritin following ferumoxides-protamine sulfate labeling of cells: implications for cellular magnetic resonance imaging. *NMR Biomed* 19: 581–592.
- Kostura L, Kraitchman DL, Mackay AM, Pittenger MF, Bulte JW (2004) Feridex labeling of mesenchymal stem cells inhibits chondrogenesis but not adipogenesis or osteogenesis. *NMR Biomed* 17: 513–517.
- Henning TD, Sutton EJ, Kim A, Golovko D, Horvai A, et al. (2009) The influence of ferucarbotran on the chondrogenesis of human mesenchymal stem cells. *Contrast Media Mol Imaging* 4: 165–173.
- Bulte JW, Kraitchman DL, Mackay AM, Pittenger MF (2004) Chondrogenic differentiation of mesenchymal stem cells is inhibited after magnetic labeling with ferumoxides. *Blood* 104: 3410–3412; author reply 3412–3413.
- Pawelczyk E, Jordan EK, Balakumaran A, Chaudhry A, Gormley N, et al. (2009) In vivo transfer of intracellular labels from locally implanted bone marrow stromal cells to resident tissue macrophages. *PLoS One* 4: e6712.
- Kedziorok DA, Muja N, Walczak P, Ruiz-Cabello J, Gilad AA, et al. (2010) Gene expression profiling reveals early cellular responses to intracellular magnetic labeling with superparamagnetic iron oxide nanoparticles. *Magn Reson Med* 63: 1031–1043.
- Lee KD (2008) Applications of mesenchymal stem cells: an updated review. *Chang Gung Med J* 31: 228–236.
- Jing XH, Yang L, Duan XJ, Xie B, Chen W, et al. (2008) In vivo MR imaging tracking of magnetic iron oxide nanoparticle labeled, engineered, autologous bone marrow mesenchymal stem cells following intra-articular injection. *Joint Bone Spine* 75: 432–438.
- Kijowski R (2010) Clinical cartilage imaging of the knee and hip joints. *AJR Am J Roentgenol* 195: 618–628.
- Saldanha KJ, Doan RP, Ainslie KM, Desai TA, Majumdar S (2010) Micrometer-sized iron oxide particle labeling of mesenchymal stem cells for magnetic resonance imaging-based monitoring of cartilage tissue engineering. *Magn Reson Imaging*.
- van Tiel ST, Wielopolski PA, Houston GC, Krestin GP, Bernsen MR (2010) Variations in labeling protocol influence incorporation, distribution and retention of iron oxide nanoparticles into human umbilical vein endothelial cells. *Contrast Media Mol Imaging* 5: 247–257.
- Arbab AS, Bashaw LA, Miller BR, Jordan EK, Lewis BK, et al. (2003) Characterization of biophysical and metabolic properties of cells labeled with superparamagnetic iron oxide nanoparticles and transfection agent for cellular MR imaging. *Radiology* 229: 838–846.
- Rad AM, Arbab AS, Iskander AS, Jiang Q, Soltanian-Zadeh H (2007) Quantification of superparamagnetic iron oxide (SPIO)-labeled cells using MRI. *J Magn Reson Imaging* 26: 366–374.
- Politi LS, Bacigaluppi M, Brambilla E, Cadioli M, Falini A, et al. (2007) Magnetic-resonance-based tracking and quantification of intravenously injected neural stem cell accumulation in the brains of mice with experimental multiple sclerosis. *Stem Cells* 25: 2583–2592.
- van Buul GM, Farrell E, Kops N, van Tiel ST, Bos PK, et al. (2009) Ferumoxides-protamine sulfate is more effective than ferucarbotran for cell labeling: implications for clinically applicable cell tracking using MRI. *Contrast Media Mol Imaging* 4: 230–236.
- Farrell E, Wielopolski P, Pavljasevic P, Kops N, Weinans H, et al. (2009) Cell labelling with superparamagnetic iron oxide has no effect on chondrocyte behaviour. *Osteoarthritis Cartilage* 17: 961–967.
- Chanda D, Kumar S, Ponnazhagan S (2010) Therapeutic potential of adult bone marrow-derived mesenchymal stem cells in diseases of the skeleton. *J Cell Biochem*.
- Das RH, van Osch GJ, Kreukniet M, Oostra J, Weinans H, et al. (2010) Effects of individual control of pH and hypoxia in chondrocyte culture. *J Orthop Res* 28: 537–545.
- de Mos M, Koevoet WJ, Jahr H, Versteegen MM, Heijboer MP, et al. (2007) Intrinsic differentiation potential of adolescent human tendon tissue: an in-vitro cell differentiation study. *BMC Musculoskelet Disord* 8: 16.
- Montet-Abou K, Montet X, Weissleder R, Josephson L (2005) Transfection agent induced nanoparticle cell loading. *Mol Imaging* 4: 165–171.
- Hellingman CA, Koevoet W, Kops N, Farrell E, Jahr H, et al. (2009) Fibroblast Growth Factor Receptors in in-Vitro and in-Vivo Chondrogenesis: Relating Tissue Engineering Using Adult Mesenchymal Stem Cells to Embryonic Development. *Tissue Eng Part A*.
- Bos PK, van Osch GJ, Frenz DA, Verhaar JA, Verwoerd-Verhoef HL (2001) Growth factor expression in cartilage wound healing: temporal and spatial immunolocalization in a rabbit auricular cartilage wound model. *Osteoarthritis Cartilage* 9: 382–389.
- Hauselmann HJ, Ayselotte MB, Schumacher BL, Kuettner KE, Gitelis SH, et al. (1992) Synthesis and turnover of proteoglycans by human and bovine adult articular chondrocytes cultured in alginate beads. *Matrix* 12: 116–129.
- Uitterlinden EJ, Jahr H, Koevoet JL, Jenniskens YM, Bierma-Zeinstra SM, et al. (2006) Glucosamine decreases expression of anabolic and catabolic genes in human osteoarthritic cartilage explants. *Osteoarthritis Cartilage* 14: 250–257.
- Bastiaansen-Jenniskens YM, Koevoet W, Feijt C, Bos PK, Verhaar JA, et al. (2009) Proteoglycan production is required in initial stages of new cartilage matrix formation but inhibits integrative cartilage repair. *J Tissue Eng Regen Med* 3: 117–123.
